# Supplementary material for: Magnetic properties and magnetocaloric effect of Ln = Dy, Tb carborane-based metal–organic frameworks
Source: Royal Society of Chemistry journal article supplement (doi:10.1039/d4dt00626g), 2024-01-01
Supplement: d4dt00626g1.pdf [file d4dt00626g1.pdf]

## ***Supplementary Information***

### **Magnetic properties and magnetocaloric effect of Ln=Dy, Tb carborane-based metal-organic frameworks**

*Zhen Li,<sup>a,b</sup> Ana Arauzo,<sup>c</sup> José Giner Planas<sup>a\*</sup> and Elena Bartolomé<sup>a\*</sup>*

- a. Institut de Ciència de Materials de Barcelona (ICMAB-CSIC), Campus UAB, 08193 Bellaterra, Spain.
- b. Shandong Provincial Key Laboratory of Monocrystalline Silicon Semiconductor Materials and Technology, College of Chemistry and Chemical Engineering, Dezhou University, Dezhou 253023, China.
- c. Instituto de Nanociencia y Materiales de Aragón (INMA) Departamento de Física de la Materia Condensada CSIC-Universidad de Zaragoza Zaragoza 50009, Spain.

E-mails: [ebartolome@icmab.es](mailto:ebartolome@icmab.es); [jginerplanas@icmab.es](mailto:jginerplanas@icmab.es)

**S1. Structural characterization: supplementary Figures**

**S2. Magnetization field-dependence modeling**

**S3. Corrected sum rules for lanthanide Ln<sup>3+</sup> ions**

## S1. Structural characterization: supplementary Figures

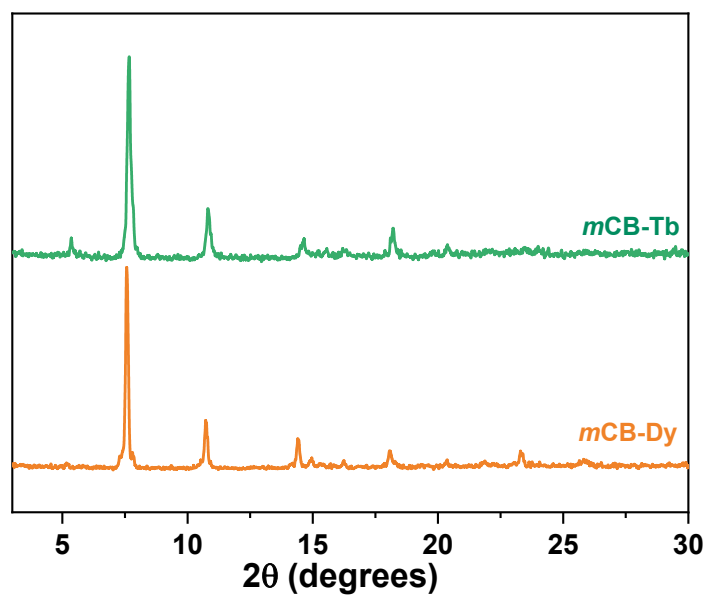

Figure S1. PXRD patterns for individual *mCB-Dy* and *mCB-Tb*.

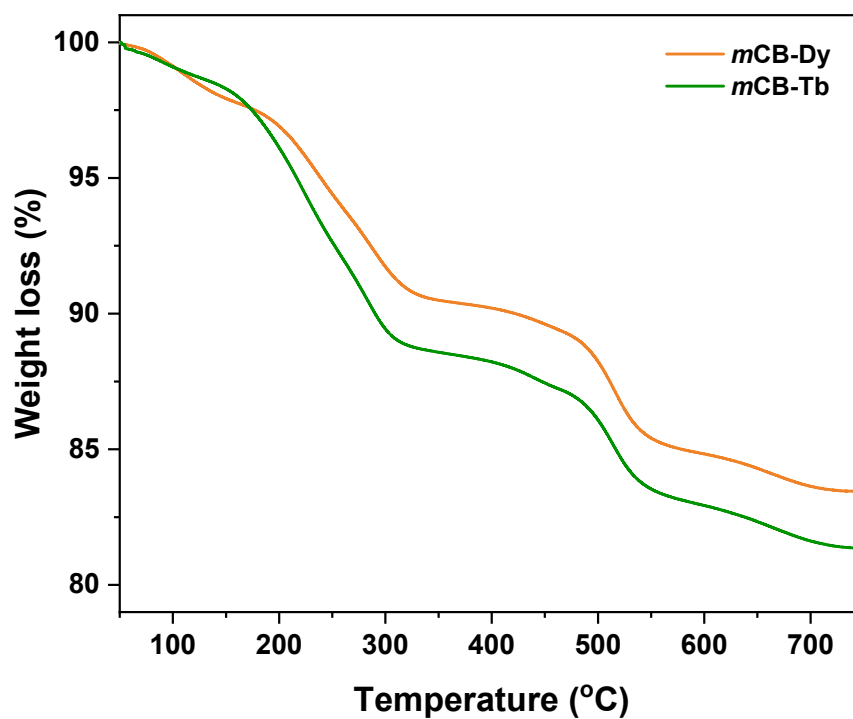

Figure S2. Comparison of the TGA for *mCB-Dy* and *mCB-Tb*.

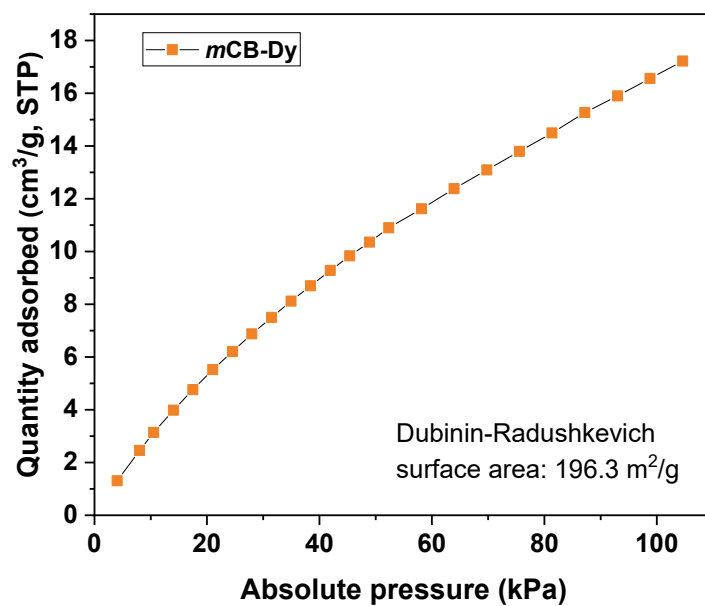

Figure S3. CO<sub>2</sub> sorption isotherms for *mCB-Dy*.

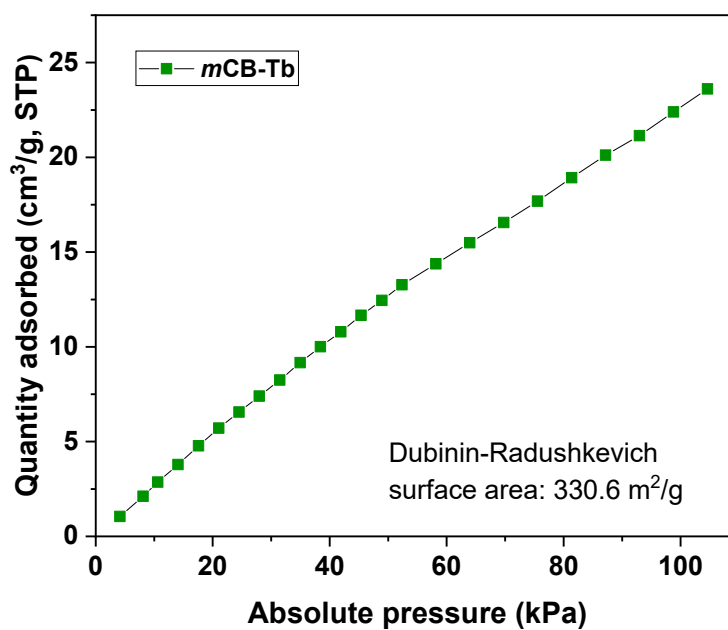

Figure S4. CO<sub>2</sub> sorption isotherms for *mCB-Tb*.

## S2. Magnetization field-dependence modeling

The magnetic properties of **mCB-Dy** and **mCB-Tb** at temperatures between 20 K-3.4 K could be modelled considering a single-ion Hamiltonian:

$$H_{si} = H_{CF} - \mu_B \vec{J} \hat{g}_J \vec{H} \quad [1]$$

acting on the  $|J, m_J\rangle$  electronic states, assuming negligible Ln-Ln interactions. The first term accounts for the effect of the crystal field surrounding the Ln ion, and the second is the Zeeman splitting in the presence of a magnetic field  $\vec{H}$ , where  $\hat{g}_J$  is the anisotropic g-tensor.

Dy(III) free-ion has a structure  $[\text{Xe}]4f^9$ , thus it is a Kramers ion with half-integer spin  $S = 5/2$  and large orbital spin  $L = 5$ . The ground state  $J = 15/2$  is split by the crystal field (CF) into 8 Kramers doublets (KDs). For Dy(III) with strong uniaxial anisotropy, the ground state doublet is often predominantly made of  $|J, M_J\rangle = |15/2, \pm 15/2\rangle$ , and the first excited KD lies well above, at an energy  $\Delta/k_B$ .

On the other hand, Tb(III) free-ion has a structure  $[\text{Xe}]4f^6$ , thus is a non-Kramers ion with integer spin  $S = 3$  and orbital spin  $L = 3$ . The  $J = 6$  ground-state contains  $2J+1=13$  degenerate  $|J, M_J\rangle$  electronic states. The CF splits the  ${}^7F_6$  ground state into 13 substates,  $\{|\xi_i\rangle\}$ , which can be described in terms of the electronic states as,  $|\xi_i\rangle = \sum_{M=-J}^J C_{J,M_J}^i |J, M_J\rangle$ . Typically, for strongly anisotropic Tb(III) the ground state  $|\xi_0\rangle$ , and the first excited state  $|\xi_1\rangle$  are primarily composed of a combination of states,  $|J, M_J\rangle = |6, \pm 6\rangle$ , with possibly some minor admixture from other  $|6, \pm M_J\rangle$  states.  $|\xi_0\rangle$ , and  $|\xi_1\rangle$  are separated only by a very small energy gap,  $\Delta/k_B$ ; thus, the ground state can be considered as a non-Kramers “quasi-doublet”, well separated from the next levels of the multiplet. (For Tb(III), with a nuclear spin  $I=3/2$ , at very low  $T$  and under strong magnetic fields, one should also consider in the Hamiltonian the hyperfine and nuclear dipolar interaction contributions to the single-ion Hamiltonian,  $H_n^* = A^* I S_z^* - \mu_N g_N I_z H_z$ , where  $g_N=1.342$  is the nuclear gyromagnetic factor).

Therefore, for both ions, at low temperatures of a few K, only the ground doublet is thermally occupied, and the system behavior can be approximately described by an “effective” Hamiltonian, acting on the wavefunctions  $|S^* = 1/2, \pm S_z^* = 1/2\rangle$ , which in the case of strong uniaxial anisotropy (Ising approximation,  $g_z^* \gg g_x^*, g_y^*$ ) reduces to:

$$H_{si}^* = H_z^* = -\mu_B S_z^* g_z^* H_z \quad [2]$$

The field-dependent magnetization curves  $M(H)$  of **mCB-Dy** and **mCB-Tb** between 0 – 5 T at temperatures between 20 K-3.4 K could be fitted considering the effective  $S^*=1/2$  Hamiltonian in Eq. [2], with gyromagnetic factor  $g_z^*=18.5$  (Dy),  $g_z^*=17.3$  (Tb),  $g_x^* = g_y^*=0$ , with an additional small linear term in the field,  $M_{VV} = \chi_{TIP} H$ . This term accounts for positive temperature-independent paramagnetism (TIP), derived by Van Vleck as a second, perturbative correction to the Zeeman interaction, due to the mixing of ground doublet with excited doublets.<sup>1</sup> It is noted that although the SBU of these MOFs consists of three Ln with slightly different coordination environments, a similar “average” gyromagnetic value was considered for the three, to avoid overparametrization.

To fit the  $M(H)$  curve at the lowest temperature,  $T=1.8$  K, interactions had to be included. Given the structure of these MOFs (Fig. 1a), intra-chain interactions are plausibly dominant;

they were modeled using a simple dimer Hamiltonian,  $H_{int,z}^* = -2 \sum_{1,2} J_z^* S_{1,z}^* S_{2,z}^*$ , yielding a small, ferromagnetic anisotropic coupling constant,  $J_z^*/k_B = +0.45$  K (+0.50 K), for **mCB-Dy** (**mCB-Tb**) respectively.

### S3. Corrected sum rules for lanthanide Ln<sup>3+</sup> ions

The orbital moment ( $m_L$ ), spin moment ( $m_s$ ) and total magnetic moment ( $m_{TOT} = m_L + m_s$ ) for Dy<sup>3+</sup> and Tb<sup>3+</sup> in, respectively, **mCB-Dy** and **mCB-Tb** were determined from the XAS and XMCD spectra measured at the M<sub>4,5</sub> edge of each ion, using the corrected sum rules for lanthanides, following the procedure described by S. Tripathi<sup>2</sup> as follows:

1. The uncorrected sum rules developed by Thole and Carra<sup>3,4</sup> are first applied to obtain the experimental expectation values of the orbital operator projection along the  $z$  (photon beam) direction,  $\langle L_{z,exp} \rangle$ , and effective spin operator projection along the  $z$  –direction  $\langle S_{z,exp}^{eff} \rangle$ :

$$\langle L_{z,exp} \rangle = -\frac{q}{r} n_h,$$

$$\langle S_{z,exp}^{eff} \rangle = -\frac{(5p-3q)}{4r} n_h = \langle S_z \rangle + 3\langle T_z \rangle,$$

where  $n_h$  is the number of holes,  $p$  is the integral of the XMCD spectrum across the M<sub>5</sub> edge,  $q$  is the integral of the XMCD spectrum across M<sub>4</sub>+M<sub>5</sub> edges, and  $r$  is the integral of the (background subtracted) XAS spectrum. The effective spin  $\langle S_{z,exp}^{eff} \rangle$  relates the expectation value of the spin  $\langle S_z \rangle$  and the magnetic dipolar term  $\langle T_z \rangle$ .

2. To correct for the effect of the 3d<sub>5/2</sub> – 3d<sub>3/2</sub> mixing, which can be strong for Ln<sup>3+</sup> ions, the experimental effective spin must be divided by a correcting factor  $X_I/X_E$  (Table S1):

$$\langle S_{z,exp}^{eff,corrMix} \rangle = \frac{\langle S_{z,exp}^{eff} \rangle}{(X_I / X_E)}.$$

3. To obtain the corrected spin operator projection along the  $z$ –direction  $\langle S_z^{corr} \rangle$ , the experimental value of the magnetic dipole term should be known. However,  $\langle T_z \rangle$  can be only estimated via theoretical calculations, which provide the expectation value when the magnetic moment is in saturation condition. A way to circumvent the problem is to calculate the *Reduction* that should be applied to the theoretical value,  $\langle T_{z,Takeo} \rangle$ , calculated in Ref. <sup>5</sup> (Table S1):

$$\text{Reduction} = \frac{\langle S_{z,LFM}^{eff} \rangle}{\langle S_{z,exp}^{eff} \rangle},$$

this is, the ratio between the effective spin moment calculated from sum rules applied to ligand field multiplet (LFM)-simulated spectra,  $\langle S_{z,LFM}^{eff} \rangle$ , and the experimental effective spin,  $\langle S_{z,exp}^{eff} \rangle$ . Thus, the corrected spin operator is determined as:

$$\langle S_z^{corr} \rangle = \langle S_{z,exp}^{eff,corrMix} \rangle - \frac{3 \langle T_{z,Takeo} \rangle}{\text{Reduction}}.$$

4. Finally, we calculate the spin moment  $m_s = 2 \langle S_z^{corr} \rangle$ , the orbital moment  $m_L = \langle L_{z,exp} \rangle$ , and the total magnetic moment  $m_{TOT} = m_L + m_s$ .

**Table S1.** Correction factor ( $X_I/X_E$ ), effective spin moment calculated from sum rules applied to LMF-simulated spectra,  $\langle S_{z,LFM}^{eff} \rangle$ , and theoretical dipolar term magnetic dipole,  $\langle T_{z,Takeo} \rangle$ , required for the application of the corrected sum rules for Ln<sup>3+</sup> ions contained in **mCB-Dy** and **mCB-Tb**.

| Ln ion           | Number of holes ( $n_h$ ) | Correction factor $X_I/X_E$ | $\langle S_{z,LFM}^{eff} \rangle$ | $\langle T_{z,Takeo} \rangle$ |
|------------------|---------------------------|-----------------------------|-----------------------------------|-------------------------------|
| Dy <sup>3+</sup> | 5                         | 0.923                       | -1.877                            | 0.139                         |
| Tb <sup>3+</sup> | 6                         | 0.871                       | -1.928                            | 0.253                         |

## References

1. J. H. Van Vleck, Phys. Rev. 31, 587 (1928).
2. S. Tripathi, "XMCD investigation at M4,5 edges of the rare earth elements in high-performance permanent magnet", PhD Thesis, Max-Planck-Institut für Intelligente Systeme, Stuttgart, 2018.
3. P. Carra, B. T. Thole, M. Altarelli and X. Wang, Phys. Rev. Lett., 1993, 70, 694–697.
4. B. Thole, P. Carra, F. Sette and G. van der Laan, Phys. Rev. Lett., 1992, 68, 1943–1946.
5. Y. Teramura, A. Tanaka, B. T. Thole, T. Jo, J. Phys. Soc. Jpn. 1996, 65, 3056.
